# Supplementary material for: Sequence-based Prediction of the Cellular Toxicity Associated with Amyloid Aggregation within Protein Condensates
Source: PubMed Central journal article supplement (PMC9670855; doi:10.1021/acs.biochem.2c00499), 2022-11-07
Supplement: bi2c00499_si_001.pdf [file bi2c00499_si_001.pdf]

## Supplementary Material

### **Sequence-based prediction of the cellular toxicity associated with amyloid aggregation within protein condensates**

Attila Horvath<sup>1</sup>, Michele Vendruscolo<sup>2</sup> and Monika Fuxreiter<sup>3,4\*</sup>

<sup>1</sup>*John Curtin School of Medical Research, The Australian National University, Acton, ACT 2601 Australia*

<sup>2</sup>*Centre for Misfolding Diseases, Yusuf Hamied Department of Chemistry, University of Cambridge, Cambridge CB2 1EW, UK*

<sup>3</sup>*Department of Biomedical Sciences, University of Padova, PD 35131, Italy*

<sup>4</sup>*Department of Physics and Astronomy, University of Padova, PD 35131, Italy*

## Supplementary Tables

**Table S1. Comparison of droplet-forming probabilities, amyloid-forming probabilities and multiplicity of binding modes in single mutants of droplet, amyloid and aggregation hot-spot regions.** Classification was based on the position of the mutation. Differences were obtained between the mutant and the wild-type parameters.

**toxic:**  $\Delta e_{tox} > 0$

**non-toxic:**  $\Delta e_{tox} \leq 0$

**N:** number of mutants

**$p_{AP}$ :** amyloid-promoting probability

**$p_{DP}$ :** droplet-promoting probability

**MBM:** multiplicity of binding modes

**$\Delta p_{AP}$ :** change in amyloid-promoting probability

**$\Delta p_{DP}$ :** change in droplet-promoting probability

**$\Delta MBM$ :** change in multiplicity of binding modes

**Table S2. Comparison of droplet-forming probabilities, amyloid-forming probabilities and multiplicity of binding modes in double mutants of droplet, amyloid and aggregation hot-spot regions.** Classification was based on the position of both mutations. Differences were obtained between the mutant and the wild-type parameters. The median of the distribution is shown.

**toxic:**  $\Delta e_{tox} > 0$

**non-toxic:**  $\Delta e_{tox} \leq 0$

**N:** number of mutants

**$p_{AP}$ :** amyloid-promoting probability

**$p_{DP}$ :** droplet-promoting probability

**MBM:** multiplicity of binding modes

**$\Delta p_{AP}$ :** change in amyloid-promoting probability

**$\Delta p_{DP}$ :** change in droplet-promoting probability

**$\Delta MBM$ :** change in multiplicity of binding modes

**Table S3. Correlation between experimental ( $\Delta e_{tox}$ ) and predicted ( $\Delta p_{tox}$ ) change in cytotoxicity upon TDP-43 single and double missense mutants.** Random Forest models were developed on single and double mutants, respectively. Pearson's correlation coefficients were computed by the R program. Models developed using mutations only in droplet region are marked as 'Drop'. The parameters of number of individual decision trees ( $n_{tree}$ ) and number of variables used at each split ( $m_{try}$ ) in R with the randomForest package are displayed.

**Table S4. Droplet-landscape characterisation of ALS-associated TDP-43 single (Sheet 1) and double (Sheet 2) mutants.** In double mutants at least one of the mutations was ALS-associated. Differences were obtained between the mutant and the wild-type parameters. In case of double mutants, the values were averaged for the 312-341 region.

**MUT**: type and position of the mutation(s)  
**TOX**: measured cytotoxicity ( $\Delta e_{tox}$ )  
**SD**: experimental std of cytotoxicity  
 $\Delta p_{AP}$ : change in amyloid-promoting probability  
 $\Delta p_{DP}$ : change in droplet-promoting probability  
 $\Delta MBM$ : change in multiplicity of binding modes  
 $p_{AP}$ : amyloid-promoting probability  
 $p_{DP}$ : droplet-promoting probability  
**MBM**: multiplicity of binding modes

## Supplementary Figures

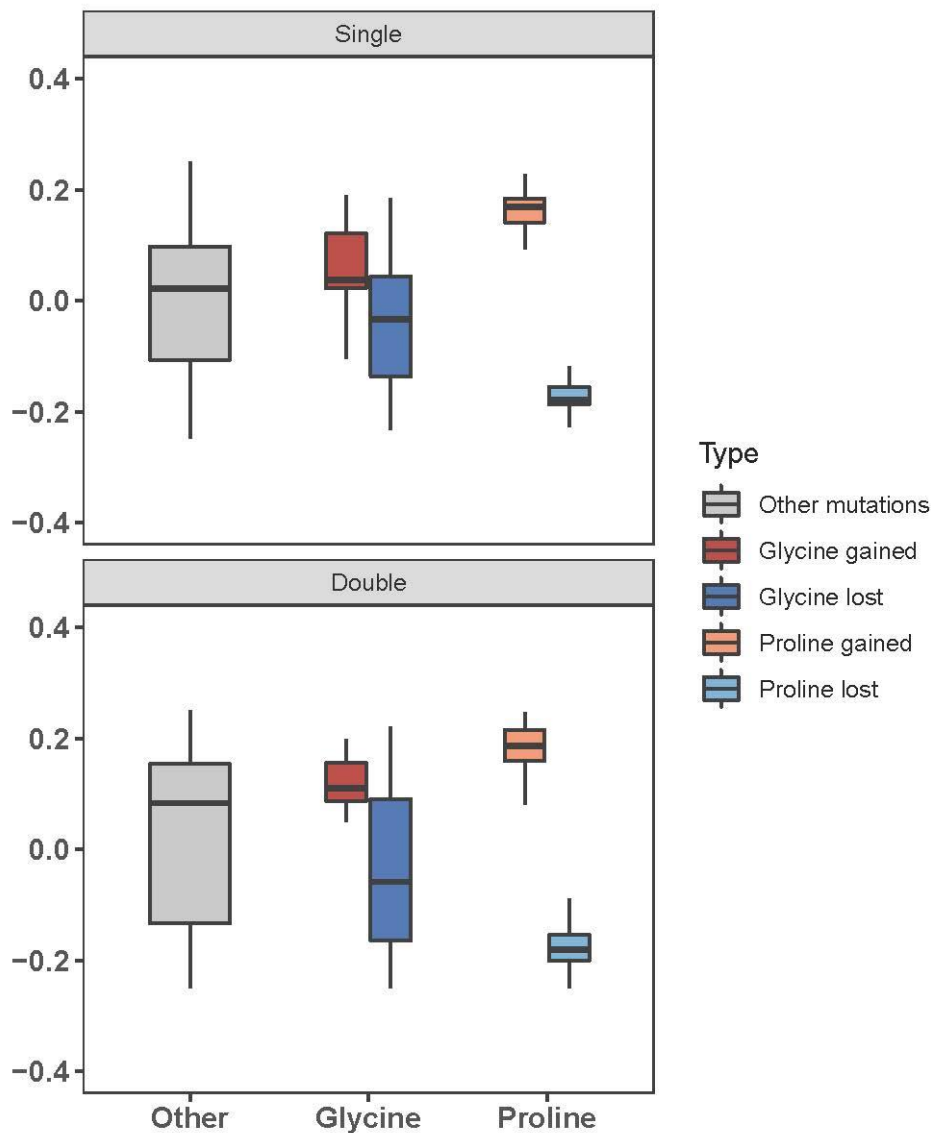

**Figure S1. Enrichment in glycine and proline increase cytotoxicity. (A) Changes in glycine and proline compositions in single TDP-43 mutations.** Mutations increasing G and P (red) increase cytotoxicity ( $\Delta e_{tox} \sim 0.05$ ), whereas mutations leading to depletion of these two residues (blue) significantly decreased cytotoxicity ( $\Delta e_{tox} \sim -0.2$ ). Other mutations (gray) have a smaller impact on cytotoxicity. **(B) Changes in glycine and proline compositions in double TDP-43 mutations.** Mutations increasing G and P (orange) increase significantly increase cytotoxicity, whereas mutations leading to depletion of these two residues (cyan) decrease cytotoxicity. Other mutations (gray) have decreased impact on cytotoxicity. Statistical analysis was performed using a Mann-Whitney test of the R program, all deviations between increased and decreased G/P content are significant.
